# Supplementary material for: Aerobic fitness in children with cerebral palsy compared to typically developing peers: A systematic review and meta-analysis
Source: PubMed Central journal article supplement (PMC11607667; doi:10.1016/j.bjpt.2024.101142), 2024-11-15
Supplement: mmc1.pdf [file mmc1.pdf]

## **Supplementary online material**

### **Aerobic fitness in children with cerebral palsy compared with typically developing peers: a systematic review and meta-analysis.**

*Emma J. Wijnhoud MD, Arnoud M.M. Edelman Bos MSc, Annemieke I. Buizer MD PhD, Heleen Beckerman PhD*

### S1 Table: Search terms and results

Search completed on November 15, 2023.

| Databases                                                                           |                       |                      |
|-------------------------------------------------------------------------------------|-----------------------|----------------------|
|                                                                                     | Before de-duplicating | After de-duplicating |
| PubMed (MEDLINE), APA<br>PsycArticles, APA PsycInfo,<br>CINAHL, SPORTDiscus (EBSCO) |                       |                      |
| <b>Total</b>                                                                        | <b>480</b>            | <b>398</b>           |

PubMed (MEDLINE)

| #        | Searches                                                                                                                                                                                                                                                                                                                                                                                                   | Results    |
|----------|------------------------------------------------------------------------------------------------------------------------------------------------------------------------------------------------------------------------------------------------------------------------------------------------------------------------------------------------------------------------------------------------------------|------------|
| 1        | "oxygen consumption"[MeSH Terms] OR "oxygen consumption"[Title/Abstract] OR "vo2"[Title/Abstract] OR "aerobic capacity"[Title/Abstract] OR "cardiorespiratory fitness"[Title/Abstract] OR "exercise capacity"[Title/Abstract] OR "oxygen uptake"[Title/Abstract]                                                                                                                                           | 164,197    |
| 2        | "cerebral palsy"[MeSH Terms] OR "cerebral palsy"[Title/Abstract]                                                                                                                                                                                                                                                                                                                                           | 32,483     |
| 3        | "child"[MeSH Terms] OR "adolescent"[MeSH Terms] OR "minors"[MeSH Terms] OR "children"[Title/Abstract] OR "kids"[Title/Abstract] OR "youth"[Title/Abstract] OR "minors"[Title/Abstract] OR "juveniles"[Title/Abstract] OR "boys"[Title/Abstract] OR "girls"[Title/Abstract] OR "preadolescents"[Title/Abstract] OR "teen*"[Title/Abstract] OR "youngsters"[Title/Abstract] OR "adolescents"[Title/Abstract] | 3,790,169  |
| <b>4</b> | <b>#1 AND #2 AND #3</b>                                                                                                                                                                                                                                                                                                                                                                                    | <b>177</b> |

PsycArticles, PsycInfo, CINAHL & SPORTDiscus (EBCOST)

| #        | Searches                                                                                                                                                  | Results    |
|----------|-----------------------------------------------------------------------------------------------------------------------------------------------------------|------------|
| 1        | TX aerobic capacity OR TX cardiorespiratory fitness OR TX exercise capacity OR TX oxygen consumption OR TX vo2                                            | 67,966     |
| 2        | TX cerebral palsy                                                                                                                                         | 33,810     |
| 3        | TX children OR TX adolescents OR TX minors OR TX kids OR TX youth OR TX boys OR TX girls OR TX preadolescent OR TX teenagers OR TX teens OR TX youngsters | 3,160,994  |
| <b>4</b> | <b>#1 AND #2 AND #3</b>                                                                                                                                   | <b>303</b> |

**S2 Table: Main characteristics and quality assessment of the 36 included studies, alphabetically ordered by first author per maximal exercise test used.**

| Study                          | Study country                | Data used more than once? <sup>‡</sup> | Data used for overall pooling in meta-analysis? | Children with TD peers |                  | Quality assessment<br>(i.e. Risk of Biased VO <sub>2peak</sub> measurement) |                                                                 |                                                                                        |     |
|--------------------------------|------------------------------|----------------------------------------|-------------------------------------------------|------------------------|------------------|-----------------------------------------------------------------------------|-----------------------------------------------------------------|----------------------------------------------------------------------------------------|-----|
|                                |                              |                                        |                                                 | CP at inclusion (n)    | at inclusion (n) | Reported how VO <sub>2peak</sub> was defined?                               | Prior stated additional peak criteria (e.g. HR, RER, exertion)? | Reporting the number of children who successfully completed the maximal exercise test? |     |
| <b>Bicycle Ergometer</b>       |                              |                                        |                                                 |                        |                  |                                                                             |                                                                 |                                                                                        |     |
| 1                              | Balemans et al. (2013)       | Netherlands                            | Yes                                             | <b>Yes</b>             | 70               | <b>31</b>                                                                   | Yes                                                             | Yes                                                                                    | Yes |
| 2                              | Balemans et al. (2015)       | Netherlands                            | Yes                                             | No                     | 46               |                                                                             | Yes                                                             | Yes                                                                                    | Yes |
| 3                              | Balemans et al. (2015)       | Netherlands                            | Yes                                             | No                     | 46               |                                                                             | Yes                                                             | Yes                                                                                    | Yes |
| 4                              | Balemans et al. (2017)       | Netherlands                            | No                                              | <b>Yes</b>             | 37               | <b>20</b>                                                                   | Yes                                                             | Yes                                                                                    | Yes |
| 5                              | Brehm et al. (2014)          | Netherlands                            | Yes                                             | No                     | 21               |                                                                             | Yes                                                             | Yes                                                                                    | Yes |
| 6                              | Depiazzi et al. (2021)       | Australia                              | No                                              | <b>Yes</b>             | 12               |                                                                             | Yes                                                             | Yes                                                                                    | Yes |
| 7                              | Jung et al. (2015)           | Republic of Korea                      | No                                              | <b>Yes</b>             | 4                | <b>2</b>                                                                    | Yes                                                             | No                                                                                     | Yes |
| 8                              | Leunkeu et al. (2005)        | France                                 | No                                              | No                     | 9                | <b>10</b>                                                                   | Yes                                                             | Yes                                                                                    | No  |
| 9                              | Leunkeu et al. (2009)        | France                                 | No                                              | No                     | 8                | <b>8</b>                                                                    | Yes                                                             | Yes                                                                                    | No  |
| 10                             | Nsenga Leunkeu et al. (2012) | France                                 | Yes                                             | No                     | 28               |                                                                             | Yes                                                             | No                                                                                     | Yes |
| 11                             | Nsenga et al.(2013)          | France                                 | Yes                                             | <b>Yes</b>             | 24               | <b>12</b>                                                                   | Yes                                                             | No                                                                                     | Yes |
| 12                             | Lundberg (1978)              | Sweden                                 | No                                              | <b>Yes</b>             | 9                | <b>9</b>                                                                    | No                                                              | Yes                                                                                    | Yes |
| 13                             | Lundberg (1984)              | Sweden                                 | No                                              | No                     | 26               | <b>12</b>                                                                   | No                                                              | No                                                                                     | Yes |
| 14                             | Van Wely et al. (2014)       | Netherlands                            | Yes                                             | No                     | 49               |                                                                             | No                                                              | No                                                                                     | Yes |
| 15                             | Sansare et al. (2021)        | United States of America               | No                                              | <b>Yes</b>             | 15               |                                                                             | Yes                                                             | No                                                                                     | Yes |
| <b>Treadmill exercise test</b> |                              |                                        |                                                 |                        |                  |                                                                             |                                                                 |                                                                                        |     |
| 16                             | Dahlbäck and Norlin (1985)   | Sweden                                 | No                                              | No                     | 6                |                                                                             | No                                                              | No                                                                                     | Yes |
| 17                             | Garcia et al. (2016)         | Spain                                  | No                                              | <b>Yes</b>             | 40               | <b>40</b>                                                                   | Yes                                                             | Yes                                                                                    | Yes |
| 18                             | Hoofwijk et al. (1995)       | Canada and United Kingdom              | Yes                                             | <b>Yes</b>             | 9                | <b>9</b>                                                                    | Yes                                                             | Yes                                                                                    | Yes |
| 19                             | Kim et al. (2021)            | Republic of Korea                      | Yes                                             | <b>Yes</b>             | 40               |                                                                             | No                                                              | No                                                                                     | Yes |
| 20                             | Lauglo et al. (2016)         | Norway                                 | No                                              | <b>Yes</b>             | 20               |                                                                             | Yes                                                             | Yes                                                                                    | Yes |
| 21                             | Lee et al. (2023)            | Republic of Korea                      | Yes                                             | No                     | 39               |                                                                             | No                                                              | No                                                                                     | Yes |
| 22                             | Maltais et al. (2005)        | Canada                                 | No                                              | <b>Yes</b>             | 11               |                                                                             | Yes                                                             | Yes                                                                                    | Yes |
| 23                             | Massin and Allington (1999)  | Belgium                                | No                                              | No                     | 15               |                                                                             | No                                                              | No                                                                                     | Yes |
| 24                             | Park et al. (2021)           | Republic of Korea                      | Yes                                             | No                     | 26               |                                                                             | No                                                              | No                                                                                     | Yes |
| 25                             | Unnithan et al.(1996)        | Canada                                 | Yes                                             | No                     | 9                | <b>9</b>                                                                    | Yes                                                             | No                                                                                     | Yes |
| 26                             | Verschuren and Takken (2010) | Netherlands                            | Yes                                             | <b>Yes</b>             | 24               |                                                                             | No                                                              | Yes                                                                                    | Yes |
| 27                             | Suk and Kwon (2022)          | Republic of Korea                      | Yes                                             | No                     | 46               |                                                                             | No                                                              | No                                                                                     | Yes |

| <b>Arm crank ergometer test</b>    |                                   |             |     |               |    |           |     |     |     |
|------------------------------------|-----------------------------------|-------------|-----|---------------|----|-----------|-----|-----|-----|
| 28                                 | Klimek-Piskorz and Piskorz (1997) | Poland      | No  | <b>Yes</b>    | 14 |           | No  | No  | Yes |
| 29                                 | Klimek-Piskorz et al.(2005)       | Poland      | No  | <b>Yes</b>    | 10 | <b>10</b> | Yes | Yes | Yes |
| 30                                 | Klimek-Piskorz (2006)             | Poland      | No  | <b>Yes</b>    | 8  |           | Yes | No  | Yes |
| 31                                 | Unnithan et al.(2007)             | Greece      | No  | <b>Yes</b>    | 14 |           | No  | Yes | Yes |
| <b>Shuttle Run Test</b>            |                                   |             |     |               |    |           |     |     |     |
| 32                                 | Dallmeijer and Brehm (2011)       | Netherlands | No  | <b>Yes</b>    | 8  | <b>10</b> | Yes | Yes | Yes |
| 33                                 | Zwinkels et al. (2017)            | Netherlands | Yes | <b>Partly</b> | 15 |           | No  | Yes | Yes |
| <b>Two types of exercise tests</b> |                                   |             |     |               |    |           |     |     |     |
| 34                                 | Verschuren et al.(2006)           | Netherlands | Yes | Partly        | 25 |           | No  | Yes | Yes |
| 35                                 | Piskorz and Klimek-Piskorz (1998) | Poland      | No  | <b>Yes</b>    | 15 |           | Yes | No  | Yes |
| 36                                 | Verschuren et al. (2013)          | Netherlands | No  | <b>Yes</b>    | 23 |           | Yes | Yes | Yes |

Abbreviations: CP = cerebral palsy; n = number;  $VO_{2peak}$  = peak oxygen uptake; HR = heart rate; RER = respiratory exchange ratio.

**S3 Table: VO<sub>2peak</sub> and physiological characteristics of the 36 included studies**

| Study                              | Type of maximal exercise test | Children with CP                                                                                                  |                                                                          |                                                                                             | TD peers                                             |                                                     |                                                                 |
|------------------------------------|-------------------------------|-------------------------------------------------------------------------------------------------------------------|--------------------------------------------------------------------------|---------------------------------------------------------------------------------------------|------------------------------------------------------|-----------------------------------------------------|-----------------------------------------------------------------|
|                                    |                               | VO <sub>2peak</sub> , mL/kg/min (mean ± SD) [range]                                                               | HR <sub>max</sub> , bpm (mean ± SD) [range]                              | RER (mean ± SD)                                                                             | VO <sub>2peak</sub> , mL/kg/min (mean ± SD)          | HR <sub>max</sub> , bpm (mean ± SD)                 | RER (mean ± SD)                                                 |
| <b>Balemans et al. (2013)</b>      | Cycle ergometer test          | GMFCS I (n=35): 35.5 ± 7.20*<br>GMFCS II (n=20): 33.9 ± 7.16*<br>GMFCS III (n=8): 29.3 ± 7.07*                    | GMFCS I: 192 ± 1.7<br>GMFCS II (n=23): 187 ± 2.1<br>GMFCS III: 187 ± 3.6 | GMFCS I (n=32): 1.11 ± 0.02<br>GMFCS II (n=17): 1.14 ± 0.02<br>GMFCS III (n=7): 1.13 ± 0.04 | 41.0 ± 7.24* (n=31)                                  | 194 ± 1.8                                           | NR                                                              |
| <b>Balemans et al. (2015)</b>      | Cycle ergometer test          | Overall (n=38): 31.4 ± 6.2<br>Unilateral spastic CP (n=20): 33.5 ± 5.4<br>Bilateral spastic CP (n=18): 29.0 ± 6.3 | NR                                                                       | NR                                                                                          |                                                      | No TD peers group                                   |                                                                 |
| <b>Balemans et al. (2015)</b>      | Cycle ergometer test          | Overall (n=38): 31.4 ± 6.2<br>Unilateral spastic CP (n=20): 33.5 ± 5.4<br>Bilateral spastic CP (n=18): 29.0 ± 6.3 | NR                                                                       | NR                                                                                          |                                                      | No TD peers group                                   |                                                                 |
| <b>Balemans et al. (2017)</b>      | Cycle ergometer test          | GMFCS I (n=13): 40.0 ± 8.6<br>GMFCS II (n=17): 36.4 ± 6.8<br>GMFCS III (n=7): 31.5 ± 7.7                          | GMFCS I: 190 ± 12<br>GMFCS II: 190 ± 8<br>GMFCS III: 181 ± 11            | GMFCS I: 1.09 ± 0.14<br>GMFCS II: 1.12 ± 0.16<br>GMFCS III: 1.07 ± 0.07                     | 50.2 ± 8.5 (n=20)                                    | 193 ± 9                                             | 1.06 ± 0.05                                                     |
| <b>Brehm et al. (2014)</b>         | Cycle ergometer test          | 39.8 ± 7.7 (n=16)                                                                                                 | 190 ± 11                                                                 | 1.05 ± 0.14                                                                                 |                                                      | No TD peers group                                   |                                                                 |
| <b>Dahlbäck and Norlin (1985)</b>  | Treadmill exercise test       | NR                                                                                                                | 152 ± 8                                                                  | 0.92 ± 0.06                                                                                 |                                                      | No TD peers group                                   |                                                                 |
| <b>Dallmeijer and Brehm (2011)</b> | Shuttle run test              | 37.2 ± 2.2 (n=7)                                                                                                  | 197 ± 8 (n=6)                                                            | 1.02 ± 0.09 (n=7)                                                                           | 45.0 ± 5.3 (n=10)                                    | 200 ± 7 (n=10)                                      | 0.96 ± 0.07 (n=10)                                              |
| <b>Depiazzi et al. (2021)</b>      | Cycle ergometer test          | Control group (n=6): 31.45 ± 4.55<br>Intervention group (n=6): 32.40 ± 9.35                                       | Control group: 176 ± 16.8<br>Intervention group: 175 ± 11.2              | 1.18 (range 1.03 ± 1.24) (n=12)                                                             |                                                      | No TD peers group                                   |                                                                 |
| <b>Garcia et al. (2016)</b>        | Treadmill exercise test       | 28.7 ± 7.0 (n=40)                                                                                                 | NR                                                                       | NR                                                                                          | 40.2 ± 9.0 (n=40)                                    | NR                                                  | NR                                                              |
| <b>Hoofwijk et al. (1995)</b>      | Treadmill exercise test       | Overall (n=9): 32.7 ± 4.8<br>Boys (n=7): 32.6 ± 5.4<br>Girls (n=2): 33.3 ± 2.3                                    | Overall: 189 ± 17<br>Boys: 191 ± 19<br>Girls: 183 ± 4                    | Overall: 1.14 ± 0.06<br>Boys: 1.14 ± 0.06<br>Girls: 1.13 ± 0.08                             | Overall (n=9): 45.20 ± 8.4<br>Boys (n=7): 48.6 ± 5.7 | Overall: 197 ± 9<br>Boys: 195 ± 9<br>Girls: 205 ± 4 | Overall: 1.15 ± 0.06<br>Boys: 1.16 ± 0.05<br>Girls: 1.13 ± 0.08 |

|                                          |                          |                                                                                               |                                                                               |                                                                                                                        |                                                                     |                                            |                                         |
|------------------------------------------|--------------------------|-----------------------------------------------------------------------------------------------|-------------------------------------------------------------------------------|------------------------------------------------------------------------------------------------------------------------|---------------------------------------------------------------------|--------------------------------------------|-----------------------------------------|
| <b>Jung et al. (2015)</b>                | Cycle ergometer test     | 37.6 ± 16.35* (n=4)                                                                           | 138 ± 8.07                                                                    | 1.06 ± 0.18                                                                                                            | Girls (n=2): 33.2 ± 1.6<br>39.7 ± 23.76* (n=2)                      | 120 ± 15                                   | 0.90 ± 0.08                             |
| <b>Kim et al. (2021)</b>                 | Treadmill exercise test  | Overall (n=37): 25.44 ± 3.73<br>GMFCS I (n=21): 26.20 ± 4.13<br>GMFCS II (n=16): 24.42 ± 2.94 | Overall: 167.08 ± 12.75<br>GMFCS I: 165.38 ± 15.07<br>GMFCS II: 169.31 ± 8.83 | Overall: 0.98 ± 0.05<br>GMFCS I: 0.97 ± 0.05<br>GMFCS II: 0.99 ± 0.04                                                  |                                                                     | No TD peers group                          |                                         |
| <b>Klimek-Piskorz and Piskorz (1997)</b> | Arm crank ergometer test | 35.0 ± 6.1 (n=14)                                                                             | 182 ± 15                                                                      | NR                                                                                                                     |                                                                     | No TD peers group                          |                                         |
| <b>Klimek-Piskorz et al. (2005)</b>      | Arm crank ergometer test | 45.0 ± 5.0 (n=10)                                                                             | 180.1 ± 7.0                                                                   | NR                                                                                                                     | 46.2 ± 5.4 (n=10)                                                   | 199.0 ± 6.5                                | NR                                      |
| <b>Klimek-Piskorz (2006)</b>             | Cycle ergometer test     | 26.4 ± 3.3 (n=8)                                                                              | 177 ± 12                                                                      | NR                                                                                                                     |                                                                     | No TD peers group                          |                                         |
| <b>Lauglo et al. (2016)#</b>             | Treadmill exercise test  | 39.9 (30.5-45.0) (n=8)                                                                        | 193 (186-199)                                                                 | NR                                                                                                                     |                                                                     | No TD peers group                          |                                         |
| <b>Lee et al. (2023)</b>                 | Treadmill exercise test  | 25.50 ± 3.58 (n=39)                                                                           | 167.41 ± 13.83                                                                | 0.98 ± 0.05                                                                                                            |                                                                     | No TD peers group                          |                                         |
| <b>Leunkeu et al. (2005)</b>             | Cycle ergometer test     | 20.6 (n=9)                                                                                    | NR                                                                            | NR                                                                                                                     |                                                                     | No average data available                  |                                         |
| <b>Leunkeu et al. (2009)</b>             | Cycle ergometer test     | 31.27 ± 12.04#                                                                                | No average data available                                                     | NR                                                                                                                     |                                                                     | No average data available                  |                                         |
| <b>Nsenga Leunkeu et al. (2012)</b>      | Cycle ergometer test     | 32.3 ± 6.3 (n=28)                                                                             | 148.4 ± 25.1                                                                  | NR                                                                                                                     |                                                                     | No average data available                  |                                         |
| <b>Nsenga et al. (2013)</b>              | Cycle ergometer test     | Control group (n=10): 34.9 ± 6.4<br>Intervention group (n=10): 35.6 ± 5.6                     | Control group: 181.1 ± 10.0<br>Intervention group: 181.1 ± 10.2               | NR                                                                                                                     | 43.0 ± 4.4 (n=10)                                                   | 197.2 ± 18.0                               | NR                                      |
| <b>Lundberg (1978)</b>                   | Cycle ergometer test     | Boys (n=5): 48 ± 10<br>Girls (n=4): 37 ± 6                                                    | Boys: 196 ± 5<br>Girls: 195 ± 11                                              | Boys: 0.90 ± 0.09<br>Girls: 0.87 ± 0.04                                                                                | Boys (n=6): 54 ± 8<br>Girls (n=3): 45 ± 10                          | Boys: 195 ± 6<br>Girls: 201 ± 8            | Boys: 0.96 ± 0.04<br>Girls: 1.06 ± 0.10 |
| <b>Lundberg (1984)</b>                   | Cycle ergometer test     | Diplegic boys (n=12): y = 20.9 + 2.00*age<br>Diplegic girls (n=7): y = 31.8 + 0.54*age        | Diplegic total (n = 19): y=203.7 – 0.56x                                      | Diplegic total (n = 19): 0.90 ± 0.04<br>Dyskinetic total (n = 4): 0.96 ± 0.03<br>Hemiplegic total (n = 3): 0.99 ± 0.00 | Boys (n=7): y = 43.1 + 1.28*age<br>Girls (n=5): y = 47.0 + 0.10*age | Controls total (n = 12): y = 202.1 – 0.55x | Controls total (n = 12): 1.02 ± 0.02    |
| <b>Maltais et al. (2005)</b>             | Treadmill exercise test  | 34.0 ± 9.2 (n=11)                                                                             | 189 ± 12                                                                      | 1.05 ± 0.11                                                                                                            |                                                                     | No TD peers group                          |                                         |
| <b>Massin and Allington (1999)</b>       | Treadmill exercise test  | No average data available                                                                     | NR                                                                            | NR                                                                                                                     |                                                                     | No TD peers group                          |                                         |

|                                          |                          |                                                                                                                                                             |                                                                                                                        |                                                               |                  |    |                                                                                                            |
|------------------------------------------|--------------------------|-------------------------------------------------------------------------------------------------------------------------------------------------------------|------------------------------------------------------------------------------------------------------------------------|---------------------------------------------------------------|------------------|----|------------------------------------------------------------------------------------------------------------|
| <b>Park et al. (2021)</b>                | Treadmill exercise test  | Control group (n=13): 26.62 ± 5.10<br>Intervention group (n=13): 25.25 ± 2.69                                                                               | Control group: 164.23 ± 14.87<br>Intervention group: 165.62 ± 13.22                                                    | NR                                                            |                  |    | No TD peers group                                                                                          |
| <b>Piskorz and Klimek-Piskorz (1998)</b> | Arm crank ergometer test | 35.8 ± 7.7 (n=15)                                                                                                                                           | 177 ± 11                                                                                                               | NR                                                            |                  |    | No TD peers group                                                                                          |
| <b>Sansare et al. (2021)</b>             | Cycle ergometer test     | 45.0 ± 5.7 (n=15)                                                                                                                                           | 179 ± 10                                                                                                               | NR                                                            |                  |    | No TD peers group                                                                                          |
|                                          | Cycle ergometer test     | Control group (n=11): 24.9 [95%CI: 20-29.9]<br>Intervention group 1 (n=14): 24.9 [95%CI: 18.4-31.4]<br>Intervention group 2 (n=11): 24.5 [95%CI: 17.7-31.4] | Control group: 49 [95%CI: 37-61]<br>Intervention group 1: 61 [95%CI: 45-77]<br>Intervention group 2: 47 [95%CI: 30-64] | NR                                                            |                  |    | No TD peers group                                                                                          |
| <b>Suk and Kwon (2022)</b>               | Treadmill exercise test  | Control group (n=23): 26.31<br>Intervention group (n=23): 24.75                                                                                             | Control group: 168.62<br>Intervention group: 169.10                                                                    | Control group: 0.98<br>Intervention group: 0.98               |                  |    | No TD peers group                                                                                          |
| <b>Unnithan et al. (1996)</b>            | Treadmill exercise test  | 32.7 ± 4.8 (n=9)                                                                                                                                            | NR                                                                                                                     | NR                                                            | 45.2 ± 8.4 (n=9) | NR | NR                                                                                                         |
| <b>Unnithan et al. (2007)</b>            | Arm crank ergometer test | Control group (n=6): 17.9 ± 4.39<br>Intervention group (n=7): 17.5 ± 4.45                                                                                   | Control group: 152.0 ± 12.5<br>Intervention group: 146.0 ± 20.4                                                        | Control group: 1.07 ± 0.13<br>Intervention group: 1.02 ± 0.11 |                  |    | No TD peers group                                                                                          |
| <b>Van Wely et al. (2014)</b>            | Cycle ergometer test     | Control group (n=20): 33 ± 6.6<br>Intervention group (n=19): 30 ± 5.3                                                                                       | NR                                                                                                                     | NR                                                            |                  |    | No TD peers group                                                                                          |
| <b>Verschuren et al. (2006)</b>          | Shuttle run test         | NR                                                                                                                                                          | GMFCS I: 200.6 ± 6.7<br>GMFCS II: 199.4 ± 6.8                                                                          | GMFCS I: 1.1 ± 0.1<br>GMFCS II: 1.0 ± 0.1                     |                  |    | No TD peers group                                                                                          |
|                                          | Treadmill exercise test  | n=24<br>GMFCS I: 43.80 ± 6.50<br>GMFCS II: 39.90 ± 9.70                                                                                                     | GMFCS I: 192.9 ± 6.2<br>GMFCS II: 193.1 ± 6.1                                                                          | GMFCS I: 0.9 ± 0.9<br>GMFCS II: 1.0 ± 0.8                     |                  |    | No TD peers group                                                                                          |
| <b>Verschuren and Takken (2010)</b>      | Treadmill exercise test  | Overall (n=24): 42.0 ± 8.2<br>Boys (n=16): 44.7 ± 7.1<br>Girls (n=8): 36.4 ± 7.6                                                                            | 193.1 ± 6.2                                                                                                            | 1.0 ± 0.1                                                     |                  |    | External reference data of 336 TD peers were used. These TD peers outcomes were not included in our review |
| <b>Verschuren et al. (2013)</b>          | Arm crank ergometer test | 25.3 ± 5.7 (n=23)                                                                                                                                           | 160.5 ± 24.5                                                                                                           | 1.0 ± 0.1                                                     |                  |    | No TD peers group                                                                                          |
|                                          | Shuttle ride test        | 26.0 ± 5.0 (n=23)                                                                                                                                           | 171.0 ± 23.2                                                                                                           | 1.1 ± 0.2                                                     |                  |    | No TD peers group                                                                                          |

|                                                            |                  |                                                                                           |          |             |                   |
|------------------------------------------------------------|------------------|-------------------------------------------------------------------------------------------|----------|-------------|-------------------|
| <b>Zwinkels et al.<br/>(2017) 2004-<br/>matched sample</b> | Shuttle run test | Overall (n=25): 40.9 ± 8.4<br>GMFCS I (n=15): 41.9 ± 6.2<br>GMFCS II (n=10): 39.7 ± 10.8  | 198 ± 5  | 1.05 ± 0.11 | No TD peers group |
| <b>Zwinkels et al.<br/>(2017) 2014-<br/>matched sample</b> | Shuttle run test | Overall (n=25): 37.5 ± 10.4<br>GMFCS I (n=15): 40.2 ± 12.6<br>GMFCS II (n=10): 34.3 ± 5.0 | 183 ± 18 | 1.07 ± 0.10 | No TD peers group |

*If reported, the number of participants is noted who completed the test and were included in the analysis.*

*\* Data was reported as median (standard error) and is for the purposes of this study converted into median ± SD values.*

*# Data is reported as median (interquartile range).*

*‡Data is reported as ml/kg/lean body mass.*

*Abbreviations: bpm, beats per minute; CP, cerebral palsy; GMFCS, Gross Motor Function Classification System; n, number; NR, not reported; HR<sub>max</sub>, maximal heart rate; mL/kg/min, millilitres per kilogram per minute; RER, respiratory exchange ratio; SD, standard deviation; TD, typically developing; VO<sub>2peak</sub>, peak oxygen uptake.*
